# Supplementary material for: Efficient and Stable Air-Processed Ternary Organic Solar Cells Incorporating Gallium-Porphyrin as an Electron Cascade Material
Source: MDPI journal article supplement (doi:10.3390/nano13202800), 2023-10-21
Supplement: s1 [file s1]

# **Efficient and Stable Air-Processed Ternary Organic Solar Cells Incorporating Gallium-Porphyrin as an Electron Cascade Material**

**Anastasia Soultati <sup>1</sup>, Maria Verouti <sup>1,2</sup>, Ermioni Polydorou <sup>1</sup>, Konstantina-Kalliopi Armadorou <sup>1</sup>, Zoi Georgiopoulou <sup>1,3</sup>, Leonidas C. Palilis <sup>2</sup>, Ioannis Karatasios <sup>1</sup>, Vassilis Kilikoglou <sup>1</sup>, Alexander Chroneos <sup>4,5</sup>, Athanassios G. Coutsolelos <sup>6,\*</sup>, Panagiotis Argitis <sup>1,\*</sup> and Maria Vasilopoulou <sup>1,\*</sup>**

<sup>1</sup> Institute of Nanoscience and Nanotechnology (INN), National Center for Scientific Research (NCSR) Demokritos, 15341 Agia Paraskevi, Greece

<sup>2</sup> Department of Physics, University of Patras, 26504 Rio Patra, Greece

<sup>3</sup> Solid State Physics Section, Physics Department, National and Kapodistrian University of Athens, Panepistimioupolis, 15784 Athens, Greece

<sup>4</sup> Department of Electrical and Computer Engineering, University of Thessaly, 38221 Volos, Greece

<sup>5</sup> Department of Materials, Imperial College, London SW7 2AZ, UK

<sup>6</sup> Laboratory of Bioinorganic Chemistry, Department of Chemistry, University of Crete, Voutes Campus, P.O. Box 2208, 71003 Heraklion, Greece

\* Correspondence: acoutsol@uoc.gr (A.G.C.); p.argitis@inn.demokritos.gr (P.A.); m.vasilopoulou@inn.demokritos.gr (M.V.)

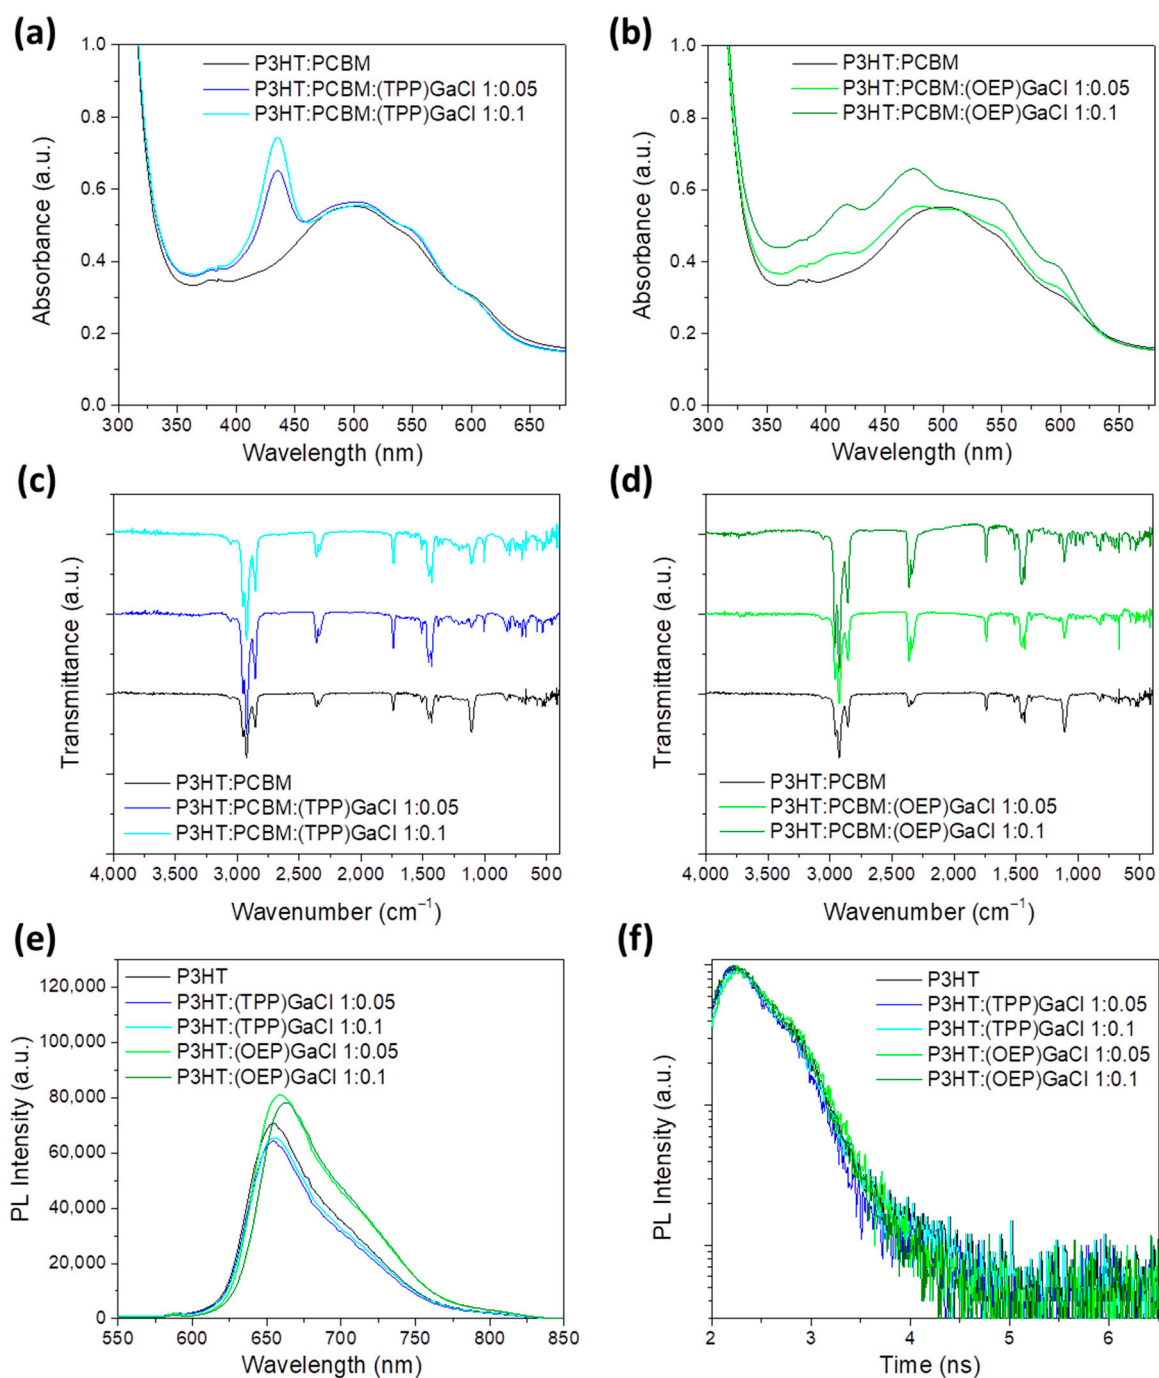

**Figure S1.** UV-Vis absorption spectra of binary and ternary P3HT:PCBM films with porphyrin additives: (a) (TPP)GaCl and (b) (OEP)GaCl in various ratios. FTIR spectra of binary and ternary P3HT:PCBM films with porphyrin additives: (c) (TPP)GaCl and (d) (OEP)GaCl in various ratios. (e) Steady-state PL spectra of P3HT without or with (TPP)GaCl and (OEP)GaCl in various ratios and (f) Transient PL dynamics of the same samples.

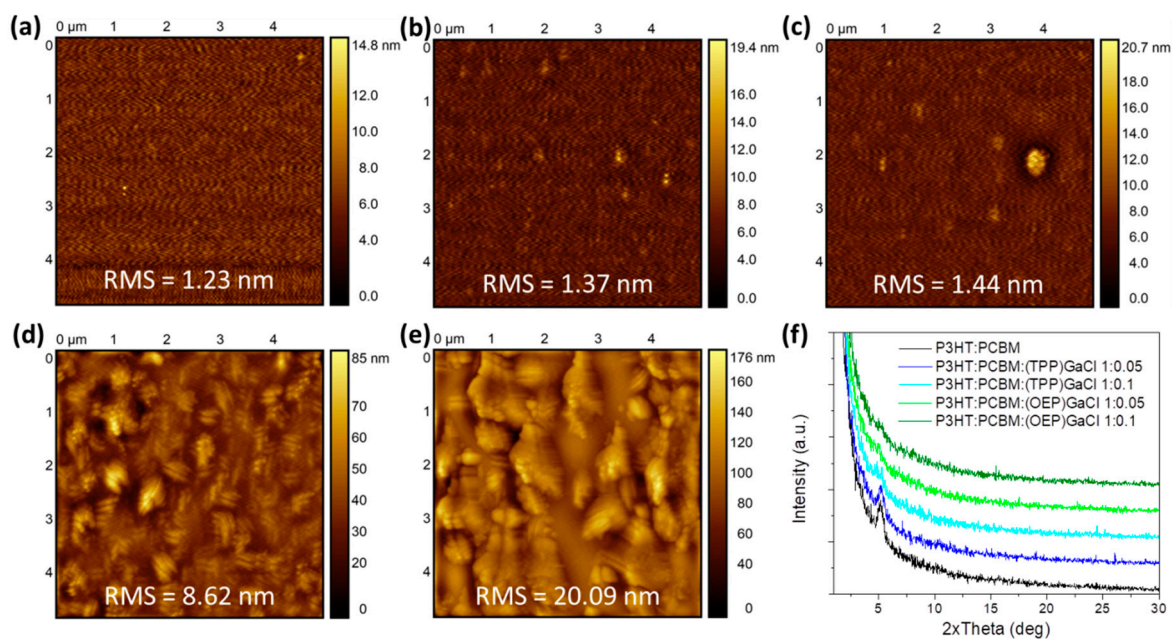

**Figure S2.**  $5 \times 5 \mu\text{m}^2$  AFM height images of (a) binary P3HT:PCBM, (b) P3HT:PCBM:(TPP)GaCl 1:0.05 (c) P3HT:PCBM:(TPP)GaCl 1:0.1, (d) P3HT:PCBM:(OEP)GaCl 1:0.05 and (e) P3HT:PCBM:(OEP)GaCl 1:0.1 ternary blended films. (f) XRD patterns of the same samples.

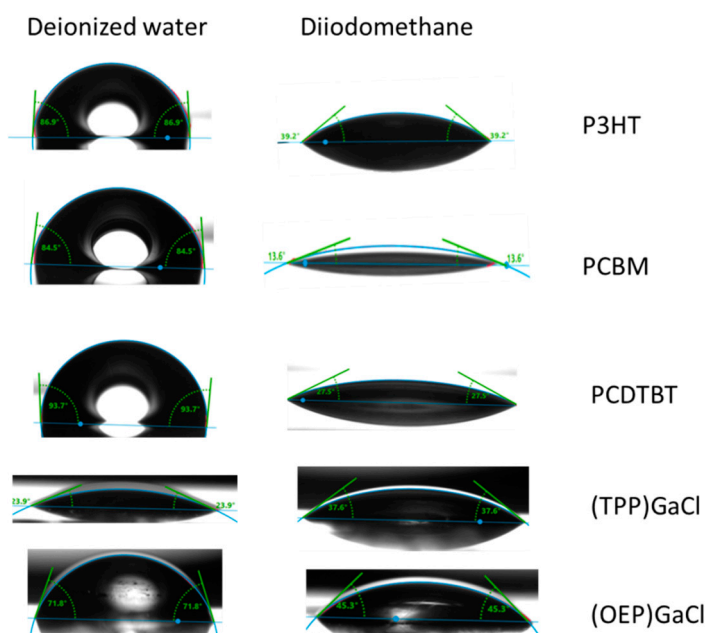

**Figure S3.** Contact angle measurements of deionized water and diiodomethane droplets on P3HT, PCBM, PCDTBT, (TPP)GaCl, and (OEP)GaCl films deposited on glass substrates.

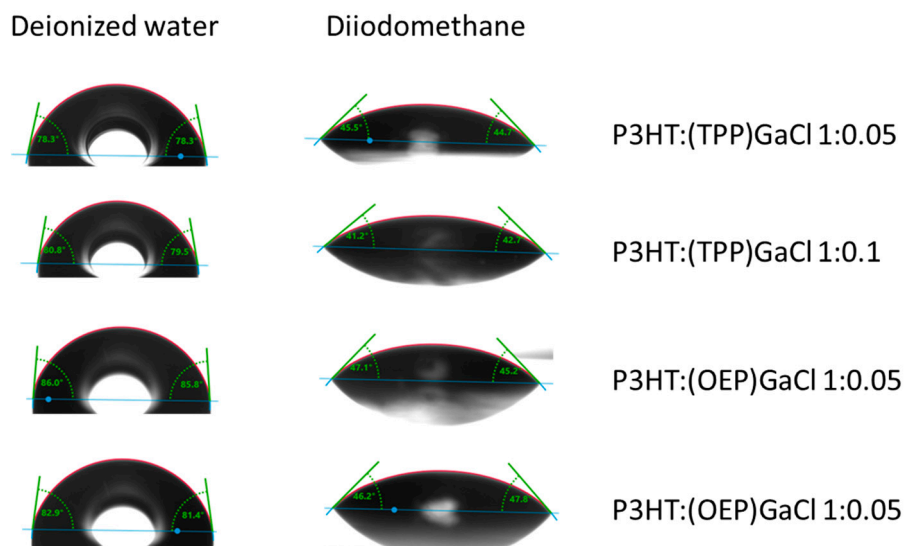

**Figure S4.** Contact angle measurements of deionized water and diiodomethane droplets on binary P3HT:(TPP)GaCl and P3HT:(OEP)GaCl films deposited on glass substrates.

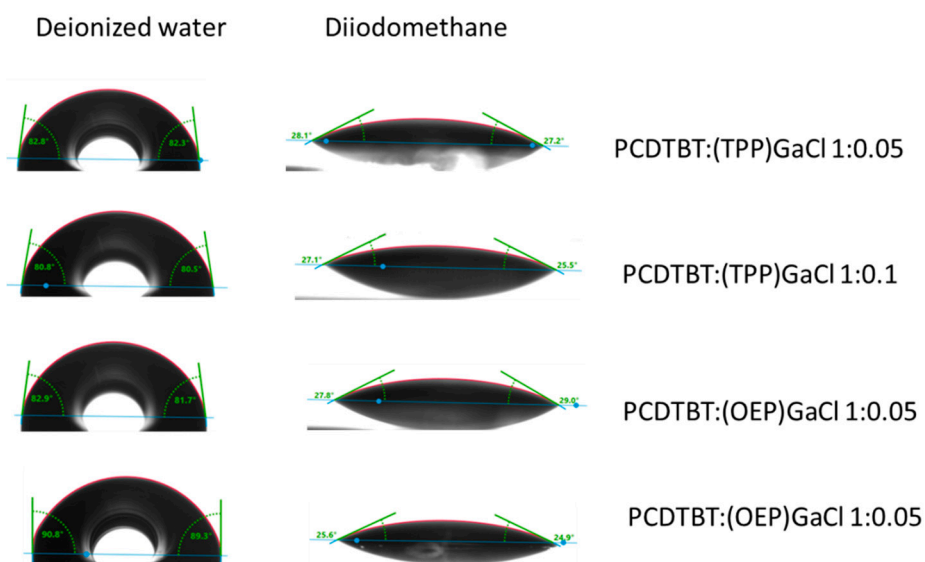

**Figure S5.** Contact angle measurements of deionized water and diiodomethane droplets on binary PCDTBT:(TPP)GaCl and PCDTBT:(OEP)GaCl films deposited on glass substrates.

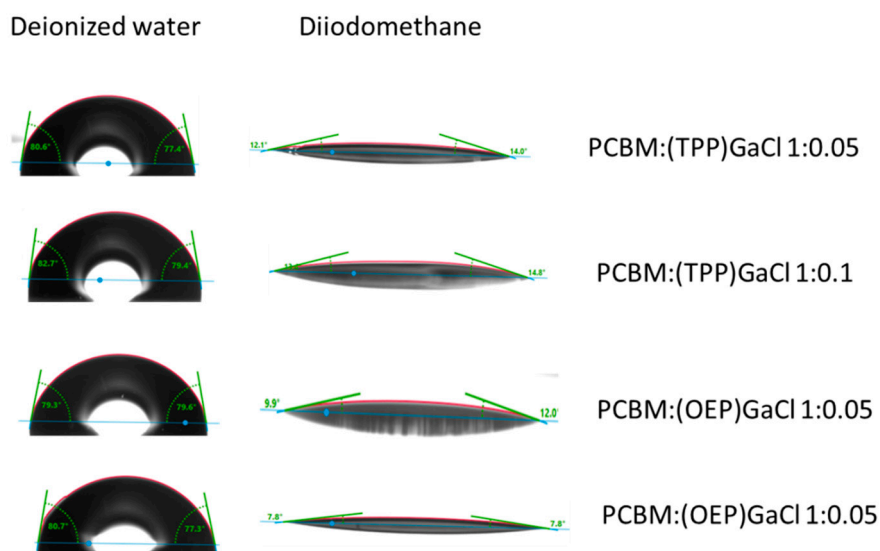

**Figure S6.** Contact angle measurements of deionized water and diiodomethane droplets on binary PCBM:(TPP)GaCl and PCBM:(OEP)GaCl films deposited on glass substrates.

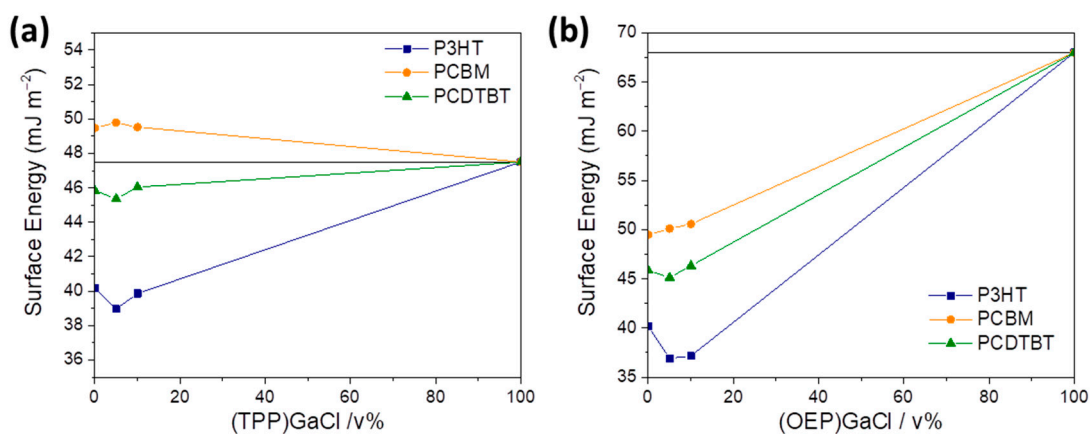

**Figure S7.** Surface energy of (a) P3HT:(TPP)GaCl, PCDTBT:(TPP)GaCl, and PCBM:(TPP)GaCl binary films, and (b) P3HT:(OEP)GaCl, PCDTBT:(OEP)GaCl, and PCBM:(OEP)GaCl binary films. The solid black line represents the surface of the neat porphyrin.

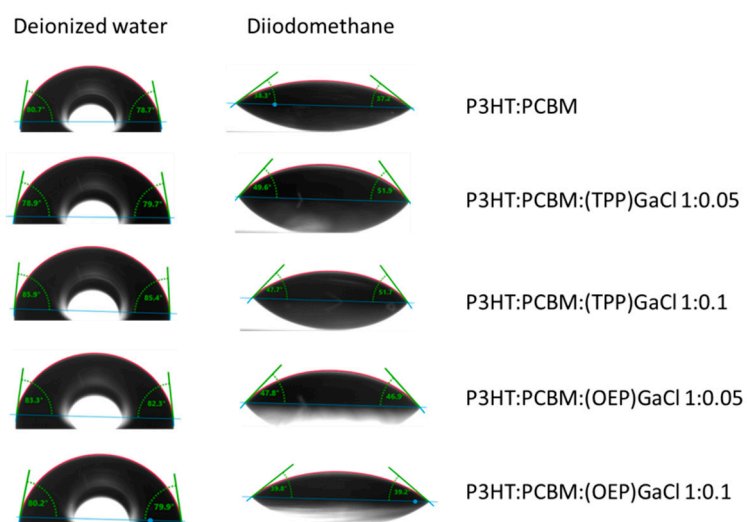

**Figure S8** Contact angle measurements of deionized water and diiodomethane droplets on binary P3HT:PCBM and ternary P3HT:PCBM:porphyrin-GaCl films deposited on glass substrates.

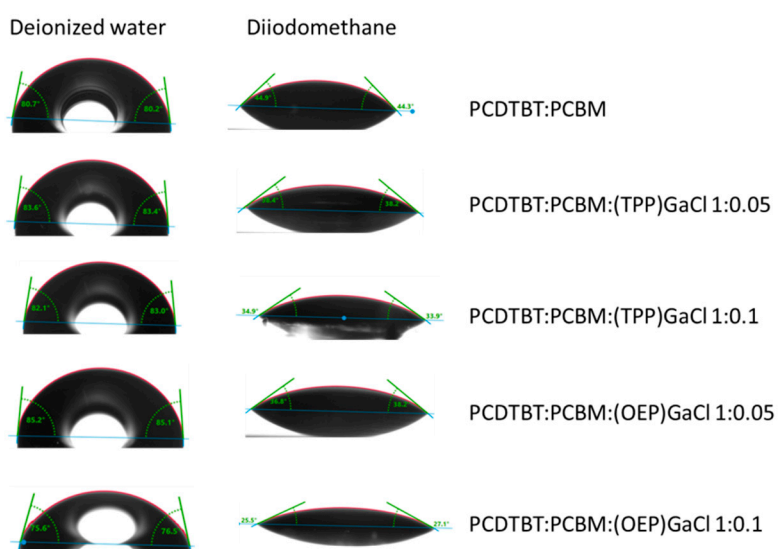

**Figure S9** Contact angle measurements of deionized water and diiodomethane droplets on binary PCDTBT:PCBM and ternary PCDTBT:PCBM:porphyrin-GaCl films deposited on glass substrates.



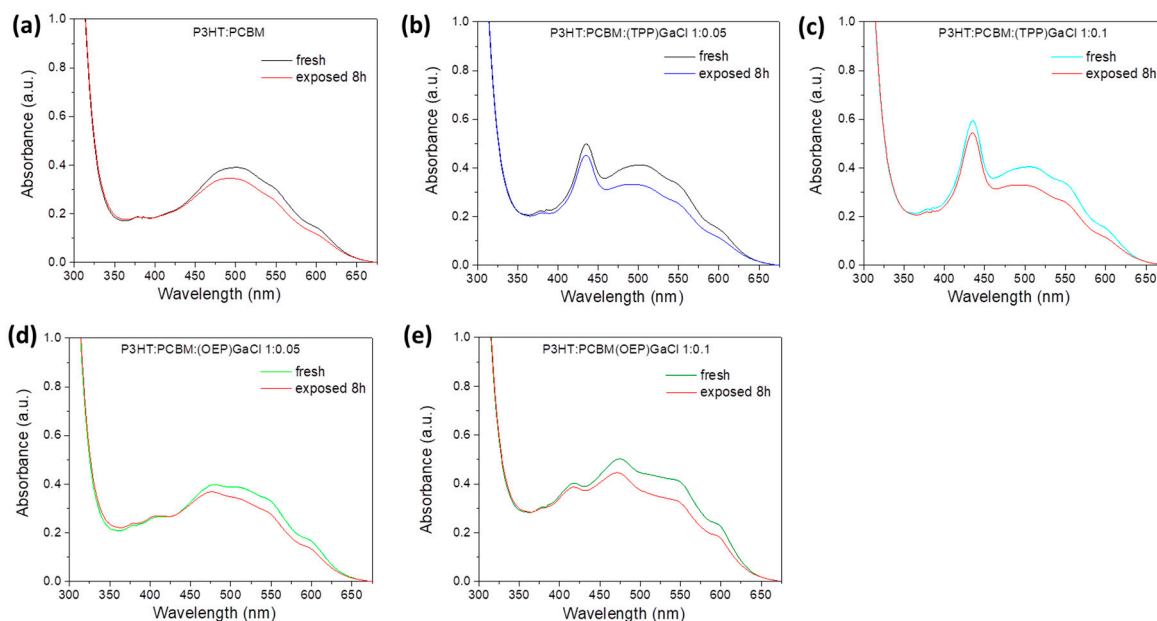

**Figure S10** UV-Vis absorption spectra of fresh and exposed to sunlight illumination for 8 h of (a) binary P3HT:PCBM and ternary (b) P3HT:PCBM:(TTP)GaCl 1:0.05, (c) P3HT:PCBM:(TTP)GaCl 1:0.1, (d) P3HT:PCBM:(OEP)GaCl 1:0.05, and (e) P3HT:PCBM:(OEP)GaCl 1:0.1 films.

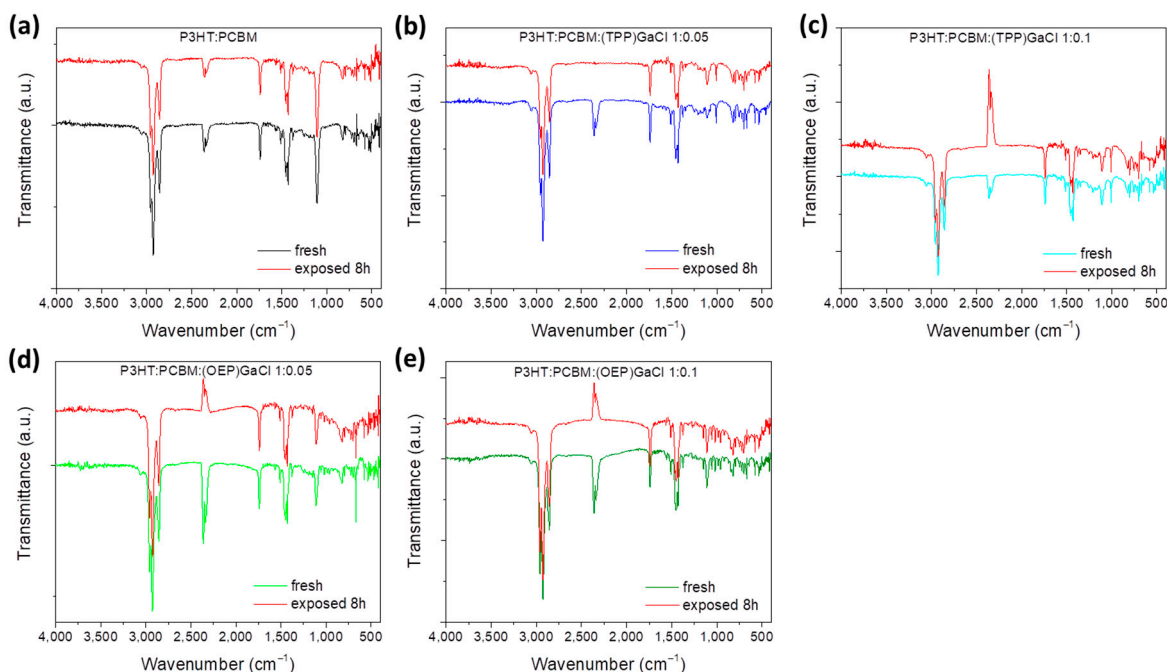

**Figure S11** FTIR spectra of fresh and exposed to sunlight illumination for 8 h of (a) binary P3HT:PCBM and ternary (b) P3HT:PCBM:(TTP)GaCl 1:0.05, (c) P3HT:PCBM:(TTP)GaCl 1:0.1, (d) P3HT:PCBM:(OEP)GaCl 1:0.05, and (e) P3HT:PCBM:(OEP)GaCl 1:0.1 films.

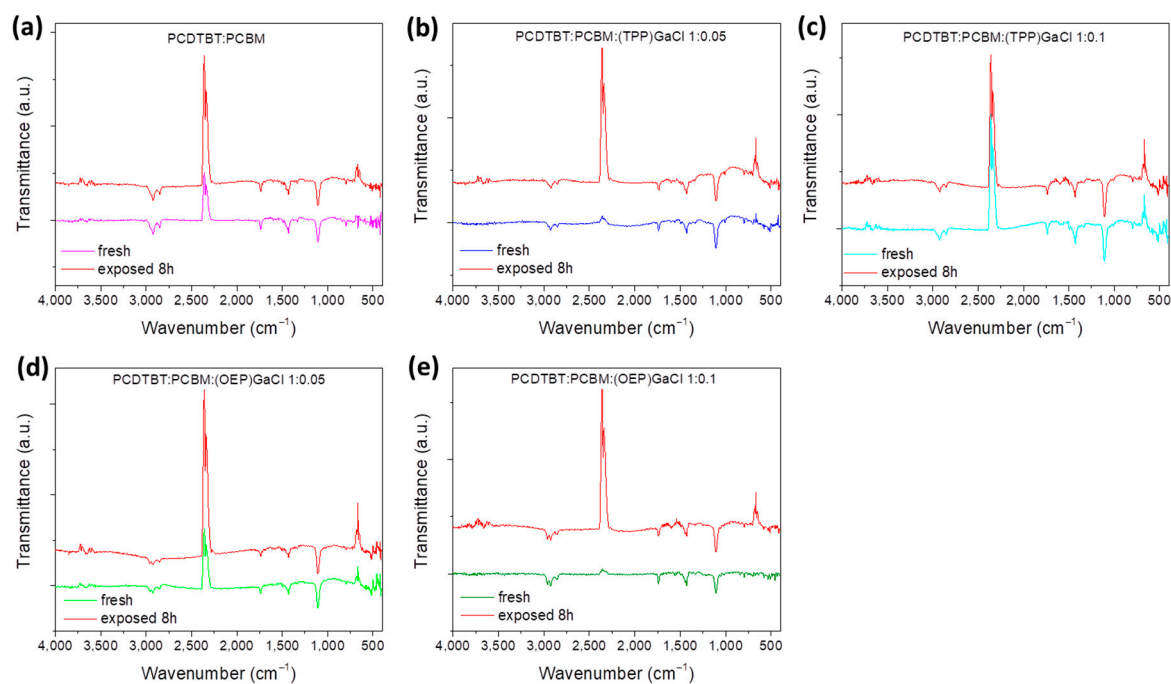

**Figure S12** FTIR spectra of fresh and exposed to sunlight illumination for 8 h of (a) binary PCDTBT:PCBM and ternary (b) PCDTBT:PCBM:(TTP)GaCl 1:0.05, (c) PCDTBT:PCBM:(TTP)GaCl 1:0.1, (d) PCDTBT:PCBM:(OEP)GaCl 1:0.05, and (e) PCDTBT:PCBM:(OEP)GaCl 1:0.1 films.



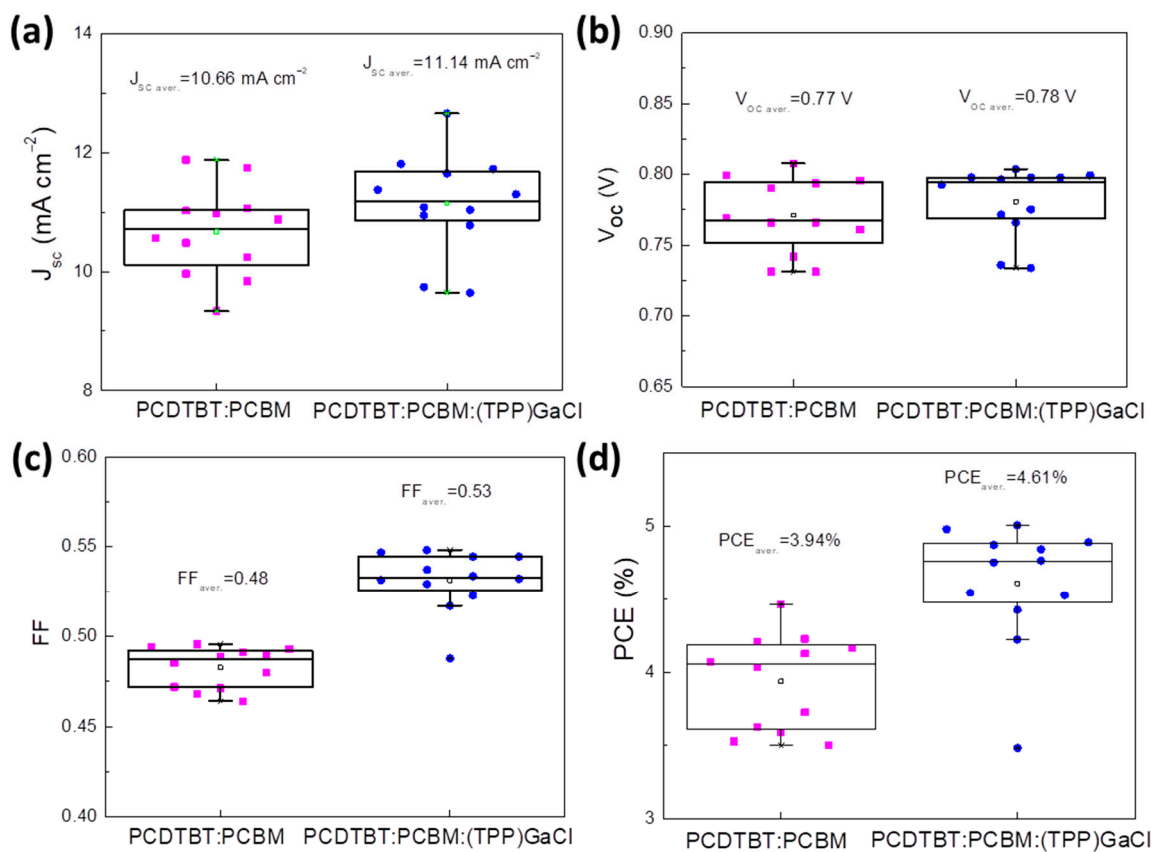

**Figure S13** Statistical analysis of the performance parameters of PCDTBT:PCBM and PCDTBT:PCBM:(TPP)GaCl OSCs (12 devices for each type): (a)  $J_{sc}$ , (b)  $V_{oc}$ , (c) FF and (d) PCE.

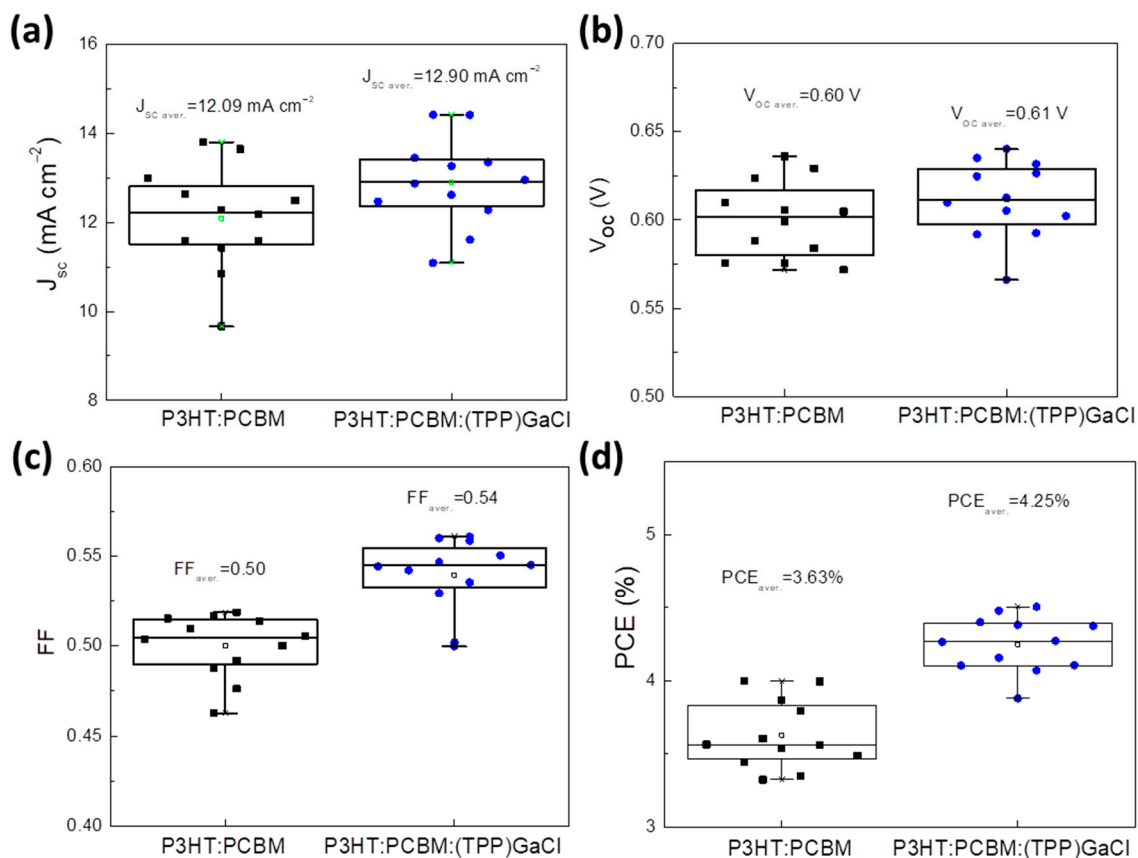

**Figure S14** Statistical analysis of the performance parameters of PCDTBT:PCBM and P3HT:PCBM:(TPP)GaCl OSCs (12 devices for each type): (a)  $J_{sc}$ , (b)  $V_{oc}$ , (c) FF and (d) PCE.

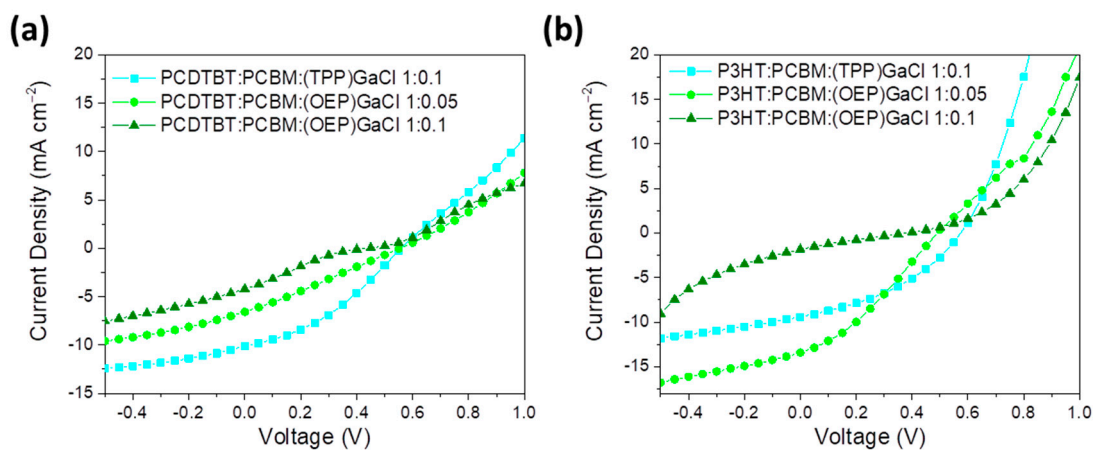

**Figure S15** J-V characteristic curves under 1.5 AM illumination of ternary OSCs based on (a) PCDTBT:PCBM and (b) P3HT:PCBM with (TPP)GaCl 1:0.1, (OEP)GaCl 1:0.05 and (OEP)GaCl 1:0.1.

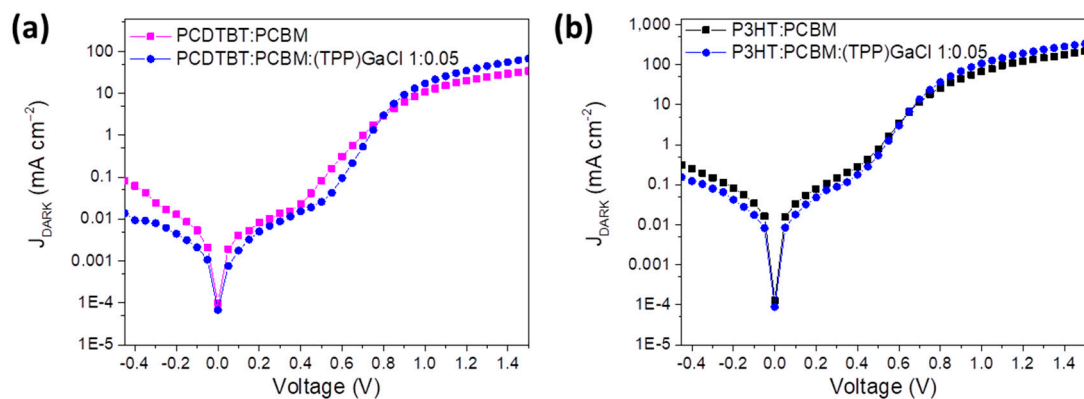

**Figure S16** Dark J-V characteristics curves of the binary and ternary OSCs based on (a) PCDTBT:PCBM and (b) P3HT:PCBM blends.

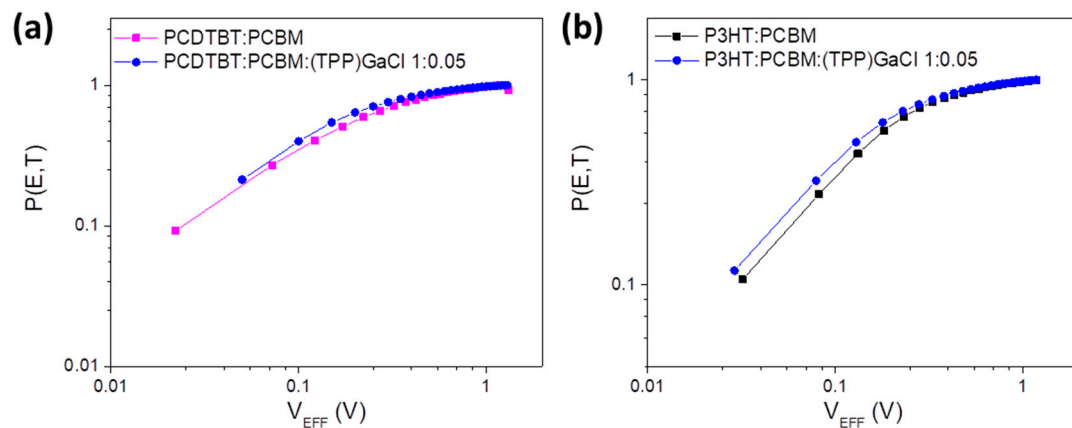

**Figure S17** Exciton dissociation probability ( $P(E,T)$ ) versus the effective voltage ( $V_{\text{EFF}}$ ) of binary and ternary OSCs based on (a) PCDTBT:PCBM and (b) P3HT:PCBM blends.

**Table S1** Contact angle and surface energy of various films.

| Materials | Contact Angle (°) | Surface Energy (mN m <sup>-1</sup> ) |
|-----------|-------------------|--------------------------------------|
| P3HT      | 86.9              | 40.2                                 |
| PCBM      | 84.5              | 49.5                                 |
| PCDTBT    | 93.7              | 45.7                                 |
| (OEP)GaCl | 23.9              | 68.1                                 |
| (TPP)GaCl | 71.8              | 41.0                                 |

**Table S2** Wetting coefficient of (TPP)GaCl and (OEP)GaCl added in P3HT:PCBM and PCDTBT:PCBM blends.

| Blends                | Ratio  | Wetting coefficient |
|-----------------------|--------|---------------------|
| P3HT:PCBM:(TPP)GaCl   | 1:0.05 | 0.26                |
| P3HT:PCBM:(TPP)GaCl   | 1:01   | 0.23                |
| P3HT:PCBM:(OEP)GaCl   | 1:0.05 | 0.32                |
| P3HT:PCBM:(OEP)GaCl   | 1:0.1  | 0.32                |
| PCDTBT:PCBM:(TPP)GaCl | 1:0.05 | 0.11                |
| PCDTBT:PCBM:(TPP)GaCl | 1:01   | 0.09                |
| PCDTBT:PCBM:(OEP)GaCl | 1:0.05 | 0.13                |
| PCDTBT:PCBM:(OEP)GaCl | 1:0.1  | 0.11                |
